# Supplementary material for: Cardiological Reference Intervals in Adult American Staffordshire Terrier Dogs
Source: MDPI journal article supplement (doi:10.3390/ani13152436), 2023-07-27
Supplement: s1 [file s1]

Table S1. Descriptive statistics of cardiological measurements obtained in a study population of 29 healthy adult American Staffordshire Terriers.

| Cardiological measurement  | Arithmetic mean (standard deviation) | Median (interquartile range) | Range        | Test of normality p-value | Skewness coefficient (CI 95%) | Kurtosis coefficient (CI 95%) |
|----------------------------|--------------------------------------|------------------------------|--------------|---------------------------|-------------------------------|-------------------------------|
| SBP [mmHg]                 | 133 (23)                             | 137 (120 – 143)              | 80 – 180     | 0.972                     | -0.19 (-1.08 – 0.70)          | 0.02 (-1.71 – 1.76)           |
| VHS                        | 10.9 (0.6)                           | 11.0 (10.5 – 11.4)           | 9.9 – 12.2   | 0.663                     | 0.31 (-0.58 – 1.20)           | -0.49 (-2.22 – 1.24)          |
| <b>Electrocardiography</b> |                                      |                              |              |                           |                               |                               |
| HR [min <sup>-1</sup> ]    | 109 (19)                             | 110 (100 – 120)              | 70 – 150     | 0.322                     | 0.17 (-0.72 – 1.06)           | -0.02 (-1.75 – 1.71)          |
| P [s]                      | 0.05 (0.01)                          | 0.05 (0.04 – 0.05)           | 0.03 – 0.06  | 0.002                     | -0.25 (-1.13 – 0.64)          | 0.04 (-1.69 – 1.77)           |
| P [mV]                     | 0.28 (0.08)                          | 0.25 (0.25 – 0.30)           | 0.15 – 0.45  | 0.019                     | 0.59 (-0.30 – 1.48)           | 0.36 (-1.37 – 2.09)           |
| PQ [s]                     | 0.11 (0.02)                          | 0.10 (0.10 – 0.12)           | 0.07 – 0.14  | 0.348                     | 0.07 (-0.81 – 0.96)           | 0.14 (-1.60 – 1.87)           |
| QRS [s]                    | 0.07 (0.01)                          | 0.07 (0.06 – 0.08)           | 0.04 – 0.08  | 0.001                     | -1.17 (-2.06 – -0.28)*L       | 2.39 (0.66 – 4.13)*LK         |
| Q [mV]                     | 0.48 (0.19)                          | 0.45 (0.35 – 0.65)           | 0.20 – 0.90  | 0.205                     | 0.43 (-0.46 – 1.32)           | -0.62 (-2.35 – 1.11)          |
| R [mV]                     | 1.80 (0.55)                          | 1.80 (1.40 – 2.05)           | 0.90 – 3.20  | 0.279                     | 0.69 (-0.20 – 1.58)           | 0.38 (-1.35 – 2.11)           |
| S [mV]                     | 0.18 (0.14)                          | 0.15 (0.10 – 0.20)           | 0.03 – 0.60  | 0.000                     | 1.78 (0.89 – 2.67)*R          | 2.83 (1.10 – 4.57)*LK         |
| QT [s]                     | 0.21 (0.02)                          | 0.21 (0.20 – 0.22)           | 0.15 – 0.25  | 0.048                     | -0.55 (-1.44 – 0.33)          | 2.11 (0.38 – 3.85)*LK         |
| ST [mV]                    | -0.14 (0.11)                         | -0.15 (-0.20 – -0.10)        | -0.35 – 0.25 | 0.016                     | 1.26 (0.37 – 2.14)*R          | 3.71 (1.97 – 5.44)*LK         |
| T [mV]                     | 0.19 (0.09)                          | 0.15 (0.15 – 0.25)           | 0.01 – 0.35  | 0.132                     | 0.27 (-0.62 – 1.16)           | -0.54 (-2.27 – 1.19)          |
| Mean electrical axis (MEA) | 31 (20)                              | 30 (15 – 46)                 | -10 – 62     | 0.311                     | -0.24 (-1.13 – 0.64)          | -0.71 (-2.45 – 1.02)          |
| <b>Echocardiography</b>    |                                      |                              |              |                           |                               |                               |
| RV [cm]                    | 1.25 (0.32)                          | 1.30 (1.00 – 1.40)           | 0.60 – 1.90  | 0.833                     | 0.18 (-0.7 – 1.07)            | -0.43 (-2.16 – 1.30)          |
| IVSd [cm]                  | 1.06 (0.14)                          | 1.05 (1.00 – 1.17)           | 0.80 – 1.40  | 0.587                     | 0.33 (-0.56 – 1.22)           | -0.04 (-1.77 – 1.69)          |
| IVSs [cm]                  | 1.41 (0.20)                          | 1.40 (1.21 – 1.60)           | 1.10 – 1.80  | 0.134                     | 0.29 (-0.6 – 1.17)            | -0.88 (-2.61 – 0.85)          |
| LVDd [cm]                  | 4.42 (0.34)                          | 4.40 (4.10 – 4.60)           | 3.70 – 5.30  | 0.804                     | 0.24 (-0.64 – 1.13)           | 0.33 (-1.40 – 2.06)           |
| LVDs [cm]                  | 3.17 (0.29)                          | 3.17 (3.00 – 3.38)           | 2.49 – 3.70  | 0.888                     | -0.31 (-1.2 – 0.58)           | -0.11 (-1.85 – 1.62)          |
| LVWd [cm]                  | 0.94 (0.12)                          | 0.92 (0.89 – 1.00)           | 0.80 – 1.30  | 0.010                     | 1.11 (0.22 – 2.00)*R          | 1.96 (0.23 – 3.70)*LK         |
| LVWs [cm]                  | 1.28 (0.20)                          | 1.21 (1.20 – 1.40)           | 0.92 – 1.80  | 0.083                     | 0.77 (-0.12 – 1.66)           | 0.94 (-0.79 – 2.67)           |
| FS [%]                     | 28.3 (4.6)                           | 28.0 (26.0 – 31.0)           | 19.0 – 38.0  | 0.604                     | 0.39 (-0.50 – 1.27)           | 0.15 (-1.59 – 1.88)           |
| EF [%]                     | 54.5 (6.7)                           | 54.0 (51.0 – 59.0)           | 40.0 – 68.0  | 0.767                     | 0.16 (-0.72 – 1.05)           | 0.03 (-1.70 – 1.76)           |
| Ao [cm]                    | 2.21 (0.17)                          | 2.2 (2.10 – 2.36)            | 1.90 – 2.60  | 0.284                     | 0.11 (-0.77 – 1.00)           | -0.42 (-2.15 – 1.32)          |
| LA [cm]                    | 2.77 (0.31)                          | 2.7 (2.56 – 2.98)            | 2.20 – 3.40  | 0.553                     | 0.34 (-0.55 – 1.22)           | -0.39 (-2.12 – 1.34)          |
| LA/Ao                      | 1.26 (0.12)                          | 1.26 (1.16 – 1.35)           | 1.01 – 1.49  | 0.800                     | -0.19 (-1.08 – 0.69)          | -0.63 (-2.36 – 1.10)          |
| EPSS [cm]                  | 0.53 (0.14)                          | 0.50 (0.40 – 0.68)           | 0.30 – 0.80  | 0.062                     | 0.22 (-0.66 – 1.11)           | -1.18 (-2.91 – 0.55)          |

|                                    |             |                    |              |       |                      |                       |
|------------------------------------|-------------|--------------------|--------------|-------|----------------------|-----------------------|
| RVOT [m/s]                         | 0.96 (0.21) | 0.98 (0.77 – 1.12) | 0.58 – 1.31  | 0.220 | -0.14 (-1.03 – 0.75) | -1.16 (-2.90 – 0.57)  |
| RVOT [mmHg]                        | 3.84 (1.62) | 3.8 (2.4 – 5.0)    | 1.30 – 6.80  | 0.167 | 0.13 (-0.76 – 1.02)  | -1.19 (-2.92 – 0.54)  |
| LVOT [m/s]                         | 1.34 (0.30) | 1.30 (1.13 – 1.44) | 0.92 – 2.20  | 0.004 | 1.38 (0.49 – 2.27)*R | 2.43 (0.70 – 4.17)*LK |
| LVOT [mmHg]                        | 7.45 (3.60) | 6.80 (5.10 – 8.30) | 3.40 – 19.40 | 0.000 | 1.97 (1.09 – 2.86)*R | 4.61 (2.88 – 6.34)*LK |
| Mitral valve E wave velocity [m/s] | 0.79 (0.17) | 0.77 (0.67 – 0.9)  | 0.52 – 1.14  | 0.551 | 0.30 (-0.59 – 1.19)  | -0.65 (-2.38 – 1.09)  |
| Mitral valve A wave velocity [m/s] | 0.66 (0.14) | 0.65 (0.58 – 0.78) | 0.41 – 0.99  | 0.690 | 0.36 (-0.53 – 1.25)  | -0.33 (-2.06 – 1.40)  |
| E/A                                | 1.22 (0.20) | 1.20 (1.12 – 1.32) | 0.82 – 1.71  | 0.537 | 0.34 (-0.55 – 1.23)  | 0.55 (-1.18 – 2.28)   |
| EDV PLAX                           | 65.8 (14.1) | 64.0 (57.2 – 73.0) | 42.0 – 104.0 | 0.456 | 0.71 (-0.18 – 1.60)  | 0.82 (-0.91 – 2.55)   |
| ESV PLAX                           | 32.0 (8.6)  | 33.0 (26.0 – 36.0) | 15.0 – 51.0  | 0.531 | 0.45 (-0.44 – 1.34)  | 0.18 (-1.56 – 1.91)   |
| EDV left A4C                       | 61.1 (14.2) | 60.5 (53.8 – 67.0) | 38.0 – 91.0  | 0.579 | 0.26 (-0.63 – 1.15)  | -0.51 (-2.25 – 1.22)  |
| ESV left A4C                       | 31.7 (9.9)  | 30.4 (23.3 – 35.0) | 21.0 – 65.0  | 0.001 | 1.63 (0.74 – 2.52)*R | 3.47 (1.74 – 5.20)*LK |
| LVDdN                              | 1.63 (0.11) | 1.63 (1.54 – 1.72) | 1.46 – 1.83  | 0.228 | 0.32 (-0.56 – 1.21)  | -0.93 (-2.66 – 0.80)  |
| LVDsN                              | 1.09 (0.10) | 1.09 (1.03 – 1.15) | 0.89 – 1.29  | 0.923 | -0.03 (-0.92 – 0.85) | -0.19 (-1.92 – 1.54)  |
| EDVI PLAX [ml/m <sup>2</sup> ]     | 67.5 (12.7) | 66.4 (62.4 – 75.9) | 45.2 – 91.9  | 0.400 | 0.04 (-0.85 – 0.93)  | -0.51 (-2.24 – 1.23)  |
| ESVI PLAX [ml/m <sup>2</sup> ]     | 32.7 (7.9)  | 33.9 (26.0 – 37.1) | 18.1 – 52.3  | 0.551 | 0.30 (-0.58 – 1.19)  | 0.15 (-1.58 – 1.88)   |
| EDVI left A4C [ml/m <sup>2</sup> ] | 63.0 (14.3) | 63.6 (53.9 – 73.8) | 39.0 – 94.0  | 0.358 | -0.04 (-0.93 – 0.85) | -0.63 (-2.36 – 1.10)  |
| ESVI left A4C [ml/m <sup>2</sup> ] | 32.4 (9.0)  | 30.2 (26.5 – 36.1) | 20.2 – 60.2  | 0.008 | 1.38 (0.49 – 2.27)*R | 2.31 (0.58 – 4.04)*LK |

\* significant deviation from symmetric or normal shape of distribution: R – right-hand asymmetry, L – left-hand asymmetry, LK – leptokurtic shape of distribution

Table S2. Relationship between cardiological measurements and demographic characteristics of dogs (gender, age, and body weight).

| Cardiological measurement  | Gender <sup>a</sup> |                    |         | Age                                  |         | Body weight                          |         |
|----------------------------|---------------------|--------------------|---------|--------------------------------------|---------|--------------------------------------|---------|
|                            | Males (n=15)        | Females (n=14)     | p-value | Correlation coefficient <sup>b</sup> | p-value | Correlation coefficient <sup>b</sup> | p-value |
| SBP [mmHg]                 | 136 (19)            | 129 (26)           | 0.407   | 0.00                                 | 0.998   | -0.13                                | 0.504   |
| VHS                        | 11.0 (0.5)          | 10.9 (0.7)         | 0.871   | -0.16                                | 0.413   | 0.12                                 | 0.519   |
| <b>Electrocardiography</b> |                     |                    |         |                                      |         |                                      |         |
| HR [min <sup>-1</sup> ]    | 110 (24)            | 109 (13)           | 0.844   | 0.01                                 | 0.948   | -0.16                                | 0.412   |
| P [s] <sup>c</sup>         | 0.05 (0.04 – 0.05)  | 0.05 (0.04 – 0.05) | 0.810   | 0.06                                 | 0.764   | -0.01                                | 0.971   |
| P [mV] <sup>c</sup>        | 0.25 (0.25 – 0.30)  | 0.28 (0.20 – 0.35) | 0.983   | 0.12                                 | 0.529   | 0.03                                 | 0.887   |
| PQ [s]                     | 0.11 (0.02)         | 0.11 (0.02)        | 0.917   | -0.11                                | 0.572   | 0.14                                 | 0.470   |
| QRS [s] <sup>c</sup>       | 0.06 (0.06 – 0.07)  | 0.07 (0.07 – 0.08) | 0.002*  | 0.09                                 | 0.653   | -0.05                                | 0.801   |
| Q [mV]                     | 0.48 (0.23)         | 0.48 (0.15)        | 0.921   | -0.47                                | 0.010*  | -0.09                                | 0.659   |

|                                                 |                       |                       |        |       |        |       |        |
|-------------------------------------------------|-----------------------|-----------------------|--------|-------|--------|-------|--------|
| R [mV]                                          | 2.03 (0.55)           | 1.54 (0.44)           | 0.014* | -0.22 | 0.261  | 0.04  | 0.835  |
| S [mV] <sup>°</sup>                             | 0.18 (0.10 – 0.35)    | 0.11 (0.10 – 0.15)    | 0.106  | 0.29  | 0.121  | 0.09  | 0.648  |
| QT [s] <sup>°</sup>                             | 0.20 (0.20 – 0.22)    | 0.21 (0.20 – 0.22)    | 0.600  | -0.12 | 0.526  | -0.37 | 0.046* |
| ST [mV] <sup>°</sup>                            | -0.15 (-0.20 – -0.10) | -0.15 (-0.20 – -0.10) | 0.965  | 0.06  | 0.760  | -0.23 | 0.231  |
| T [mV]                                          | 0.23 (0.09)           | 0.16 (0.07)           | 0.039* | -0.12 | 0.529  | -0.24 | 0.207  |
| Mean electrical axis (MEA)                      | 33 (18)               | 28 (23)               | 0.534  | 0.13  | 0.490  | -0.13 | 0.487  |
| <b>Echocardiography</b>                         |                       |                       |        |       |        |       |        |
| RV [cm]                                         | 1.29 (0.33)           | 1.21 (0.31)           | 0.513  | 0.31  | 0.102  | -0.07 | 0.710  |
| IVSd [cm]                                       | 1.11 (0.15)           | 1.01 (0.12)           | 0.065  | 0.23  | 0.229  | 0.49  | 0.007* |
| IVSs [cm]                                       | 1.41 (0.23)           | 1.41 (0.18)           | 0.984  | -0.25 | 0.187  | 0.36  | 0.055  |
| LVDd [cm]                                       | 4.42 (0.41)           | 4.42 (0.26)           | 0.994  | 0.17  | 0.389  | 0.55  | 0.002* |
| LVDs [cm]                                       | 3.15 (0.33)           | 3.21 (0.24)           | 0.588  | 0.40  | 0.033* | 0.33  | 0.080  |
| LVWd [cm]                                       | 0.94 (0.90 – 1.02)    | 0.90 (0.80 – 1.00)    | 0.077  | 0.03  | 0.887  | 0.30  | 0.109  |
| LVWs [cm]                                       | 1.31 (0.17)           | 1.26 (0.22)           | 0.490  | -0.20 | 0.304  | 0.21  | 0.269  |
| FS [%]                                          | 29.2 (3.8)            | 27.4 (5.2)            | 0.305  | -0.33 | 0.085  | 0.20  | 0.302  |
| EF [%]                                          | 55.9 (5.6)            | 53.1 (7.8)            | 0.272  | -0.33 | 0.081  | 0.18  | 0.357  |
| Ao [cm]                                         | 2.22 (0.12)           | 2.21 (0.21)           | 0.866  | -0.17 | 0.381  | 0.06  | 0.762  |
| LA [cm]                                         | 2.73 (0.24)           | 2.81 (0.37)           | 0.492  | -0.39 | 0.037* | -0.03 | 0.891  |
| LA/Ao                                           | 1.23 (0.11)           | 1.28 (0.14)           | 0.279  | -0.33 | 0.080  | -0.09 | 0.640  |
| EPSS [cm]                                       | 0.54 (0.15)           | 0.52 (0.14)           | 0.728  | -0.20 | 0.306  | -0.01 | 0.943  |
| RVOT [m/s]                                      | 1.03 (0.21)           | 0.88 (0.19)           | 0.059  | -0.61 | 0.001* | 0.10  | 0.611  |
| RVOT [mmHg]                                     | 4.41 (1.64)           | 3.24 (1.43)           | 0.052  | -0.58 | 0.001* | 0.08  | 0.673  |
| LVOT [m/s]                                      | 1.35 (1.17 – 1.52)    | 1.22 (1.04 – 1.41)    | 0.239  | -0.18 | 0.362  | -0.23 | 0.221  |
| LVOT [mmHg]                                     | 7.3 (5.5 – 9.2)       | 5.95 (4.3 – 7.9)      | 0.239  | -0.18 | 0.362  | -0.23 | 0.221  |
| Mitral valve E wave velocity [m/s]              | 0.82 (0.14)           | 0.76 (0.19)           | 0.328  | -0.36 | 0.057  | -0.05 | 0.788  |
| Mitral valve A wave velocity [m/s]              | 0.70 (0.14)           | 0.63 (0.15)           | 0.197  | -0.06 | 0.754  | 0.02  | 0.927  |
| E/A                                             | 1.21 (0.22)           | 1.23 (0.20)           | 0.765  | -0.34 | 0.074  | -0.14 | 0.458  |
| EDV PLAX                                        | 67.2 (16.1)           | 64.2 (12.1)           | 0.579  | 0.08  | 0.668  | 0.40  | 0.033* |
| ESV PLAX                                        | 33.7 (9.8)            | 30.1 (7.1)            | 0.268  | 0.38  | 0.041* | 0.41  | 0.028* |
| EDV left A4C                                    | 63.5 (14.9)           | 58.5 (13.4)           | 0.351  | 0.00  | 0.990  | 0.20  | 0.304  |
| ESV left A4C <sup>°</sup>                       | 33.0 (23.3 – 38.0)    | 27.6 (23.0 – 34.2)    | 0.295  | 0.18  | 0.360  | 0.35  | 0.061  |
| LVDdN                                           | 1.61 (0.11)           | 1.64 (0.10)           | 0.420  | 0.15  | 0.438  | -0.01 | 0.968  |
| LVDsN                                           | 1.07 (0.09)           | 1.11 (0.10)           | 0.220  | 0.37  | 0.049* | -0.19 | 0.335  |
| EDVI PLAX [ml/m <sup>2</sup> ]                  | 67.7 (14.5)           | 67.33 (11.1)          | 0.937  | 0.04  | 0.834  | -0.06 | 0.771  |
| ESVI PLAX [ml/m <sup>2</sup> ]                  | 33.8 (8.8)            | 31.5 (7.0)            | 0.446  | 0.39  | 0.038* | 0.09  | 0.651  |
| EDVI left A4C [ml/m <sup>2</sup> ]              | 64.4 (15.4)           | 61.5 (13.5)           | 0.599  | -0.04 | 0.845  | -0.22 | 0.254  |
| ESVI left A4C [ml/m <sup>2</sup> ] <sup>°</sup> | 30.2 (27.0 – 41.9)    | 30.0 (25.6 – 35.9)    | 0.527  | 0.14  | 0.457  | 0.04  | 0.823  |

<sup>a</sup> numerical values presented as the arithmetic mean and standard deviation except for non-normally distributed presented as the median and interquartile range

<sup>b</sup> assessed using the Pearson's product-moment correlation coefficient (R) except for non-normally distributed assessed using the Spearman's rank correlation coefficient (R<sub>s</sub>)

<sup>c</sup> non-normally distributed according to the Shapiro-Wilk test

\* significant at  $\alpha=0.05$

Table S3. Reference intervals (RI) for cardiological measurements obtained in a study population of 29 healthy adult American Staffordshire Terriers and commonly accepted cardiological RIs.

| Cardiological measurement  | Lower RI limit (CI 90%) | Upper RI limit (CI 90%) | Method <sup>a</sup> | Commonly used RI | Reference | RI specific for American Staffordshire Terriers (Vezzosi et al. 2021) |
|----------------------------|-------------------------|-------------------------|---------------------|------------------|-----------|-----------------------------------------------------------------------|
| SBP [mmHg]                 | 85 (74 – 97)            | 180 (168 – 192)         | UTS                 | <150             | [41]      | ND                                                                    |
| VHS                        | 9.8 (9.5 – 10.1)        | 12.1 (11.8 – 12.4)      | BCTS                | 8.5 – 10.6       | [3]       | ND                                                                    |
| <b>Electrocardiography</b> |                         |                         |                     |                  |           |                                                                       |
| HR [min <sup>-1</sup> ]    | 70 (59 – 80)            | 149 (138 – 159)         | UTS                 | 70 – 160         | [10]      | ND                                                                    |
| P [s]                      | 0.03 (0.02 – 0.04)      | 0.06 (0.05 – 0.07)      | BCTS                | <0.05            | [10]      | ND                                                                    |
| P [mV]                     | 0.14 (0.11 – 0.17)      | 0.46 (0.40 – 0.52)      | BCTS                | ≤0.4             | [10]      | ND                                                                    |
| PQ [s]                     | 0.07 (0.07 – 0.08)      | 0.14 (0.13 – 0.15)      | UTS                 | 0.06 – 0.13      | [10]      | ND                                                                    |
| QRS [s]                    | 0.04 (0.03 – 0.05)      | 0.08 (0.08 – 0.09)      | BCTS                | ≤0.06            | [10]      | ND                                                                    |
| Q [mV]                     | 0.16 (0.11 – 0.22)      | 0.94 (0.79 – 1.09)      | UTS                 | ND               | ND        | ND                                                                    |
| R [mV]                     | 0.88 (0.72 – 1.04)      | 3.15 (2.70 – 3.68)      | BCTS                | ≤3.0             | [10]      | ND                                                                    |
| S [mV]                     | 0.03 (0.02 – 0.05)      | 0.66 (0.40 – 1.05)      | BCTS                | ND               | ND        | ND                                                                    |
| QT [s]                     | 0.16 (0.15 – 0.18)      | 0.25 (0.24 – 0.26)      | BCTS                | 0.15 – 0.25      | [10]      | ND                                                                    |
| ST [mV]                    | -0.33 (-0.36 – -0.29)   | 0.14 (0.04 – 0.26)      | BCTS                | -0.2 – 0.15      | [10]      | ND                                                                    |
| T [mV]                     | 0.01 (-0.04 – 0.06)     | 0.38 (0.32 – 0.42)      | UTS                 | 0.05 – 1.00      | [10]      | ND                                                                    |
| Mean electrical axis (MEA) | -10.9 (-21.5 – 0.30)    | 72.3 (60.4 – 83.1)      | UTS                 | 40 – 100         | [10]      | ND                                                                    |
| <b>Echocardiography</b>    |                         |                         |                     |                  |           |                                                                       |
| RV [cm]                    | 0.58 (0.40 – 0.76)      | 1.91 (1.74 – 2.08)      | UTS                 | ND               | ND        | ND                                                                    |
| IVSd [cm]                  | 0.76 (0.68 – 0.84)      | 1.36 (1.28 – 1.44)      | UTS                 | 1.02 – 1.13      | [7]       | 0.59 – 1.43                                                           |
| IVSs [cm]                  | 0.98 (0.87 – 1.09)      | 1.83 (1.74 – 1.95)      | UTS                 | 1.54 – 1.70      | [7]       | 0.81 – 2.16                                                           |
| LVDd [cm]                  | 3.70 (3.50 – 3.87)      | 5.13 (4.93 – 5.32)      | UTS                 | 3.70 – 3.84      | [7]       | 3.44 – 5.12                                                           |
| LVDs [cm]                  | 2.57 (2.42 – 2.73)      | 3.78 (3.60 – 3.93)      | UTS                 | 2.32 – 2.44      | [7]       | 1.76 – 3.69                                                           |
| LVWd [cm]                  | 0.76 (0.73 – 0.80)      | 1.25 (1.13 – 1.38)      | BCTS                | 0.82 – 0.91      | [7]       | 0.62 – 1.21                                                           |

|                                    |                    |                      |      |              |      |             |
|------------------------------------|--------------------|----------------------|------|--------------|------|-------------|
| LVWs [cm]                          | 0.95 (0.89 – 1.02) | 1.78 (1.59 – 1.97)   | BCTS | 1.32 – 1.44  | [7]  | 0.93 – 1.91 |
| FS [%]                             | 18.8 (16.5 – 21.3) | 37.8 (35.2 – 40.1)   | UTS  | 25 – 39      | [10] | 20.1 – 56.4 |
| EF [%]                             | 40.5 (36.6 – 44.0) | 68.6 (64.7 – 72.3)   | UTS  | 50 – 65      | [10] | 40.5 – 82.5 |
| Ao [cm]                            | 1.86 (1.77 – 1.94) | 2.56 (2.47 – 2.65)   | UTS  | 2.53 – 2.70  | [7]  | 1.39 – 2.37 |
| LA [cm]                            | 2.14 (1.99 – 2.31) | 3.41 (3.24 – 3.57)   | UTS  | 2.39 – 2.59  | [7]  | ND          |
| LA/Ao                              | 1.00 (0.94 – 1.07) | 1.51 (1.44 – 1.57)   | UTS  | 1.00 – 1.68  | [54] | 1.00 – 1.75 |
| EPSS [cm]                          | 0.28 (0.24 – 0.33) | 0.89 (0.76 – 1.02)   | BCTS | 0.5 – 0.8    | [10] | ND          |
| RVOT [m/s]                         | 0.51 (0.39 – 0.63) | 1.40 (1.28 – 1.52)   | UTS  | <1.5         | [10] | 0.76 – 1.70 |
| RVOT [mmHg]                        | 0.99 (0.56 – 1.57) | 7.77 (6.56 – 9.12)   | BCTS | ND           | ND   | ND          |
| LVOT [m/s]                         | 0.93 (0.88 – 1.00) | 2.14 (1.81 – 2.51)   | BCTS | <1.7         | [10] | 1.17 – 2.45 |
| LVOT [mmHg]                        | 3.4 <sup>b</sup>   | 14.9 (10.6 – 18.1)   | BCTS | ND           | ND   | ND          |
| Mitral valve E wave velocity [m/s] | 0.45 (0.35 – 0.54) | 1.14 (1.04 – 1.23)   | UTS  | 0.58 – 1.17  | [55] | 0.50 – 1.29 |
| Mitral valve A wave velocity [m/s] | 0.36 (0.28 – 0.44) | 0.96 (0.89 – 1.04)   | UTS  | 0.39 – 0.86  | [55] | 0.36 – 1.16 |
| E/A                                | 0.79 (0.68 – 0.92) | 1.64 (1.52 – 1.75)   | UTS  | 0.92 – 2.72  | [55] | 0.90 – 1.88 |
| EDV PLAX                           | 41.8 (37.8 – 47.0) | 100.4 (88.7 – 112.5) | BCTS | 41.1 – 101.6 | [34] | ND          |
| ESV PLAX                           | 13.9 (9.5 – 18.9)  | 50.0 (45.3 – 54.5)   | UTS  | 18.4 – 45.6  | [34] | ND          |
| EDV left A4C                       | 31.6 (24.4 – 39.7) | 90.6 (81.9 – 98.5)   | UTS  | 41.1 – 101.6 | [34] | ND          |
| ESV left A4C                       | 19.4 (17.7 – 21.0) | 65.1 (49.2 – 103.2)  | BCTS | 18.4 – 45.6  | [34] | ND          |
| LVDdN                              | 1.41 (1.35 – 1.47) | 1.85 (1.80 – 1.91)   | UTS  | <1.85        | [8]  | 1.27 – 1.87 |
| LVDsN                              | 0.89 (0.83 – 0.95) | 1.29 (1.24 – 1.34)   | UTS  | <1.26        | [8]  | 0.64 – 1.31 |
| EDVI PLAX [ml/m <sup>2</sup> ]     | 41.0 (33.8 – 48.8) | 94.1 (86.5 – 101.1)  | UTS  | ND           | ND   | 37.1 – 86.7 |
| ESVI PLAX [ml/m <sup>2</sup> ]     | 16.2 (12.0 – 20.8) | 49.2 (44.6 – 53.4)   | UTS  | ND           | ND   | 9.5 – 35.3  |
| EDVI left A4C [ml/m <sup>2</sup> ] | 33.1 (25.3 – 41.0) | 92.8 (84.6 – 101.1)  | UTS  | ND           | ND   | ND          |
| ESVI left A4C [ml/m <sup>2</sup> ] | 20.2 <sup>b</sup>  | 50.9 (41.3 – 56.9)   | BCTS | ND           | ND   | ND          |

<sup>a</sup> UTS – untransformed standard method, BCTS – Box-Cox transformed standard method

<sup>b</sup> replaced with the lowest observed value if the CI 90% included 0.

ND – not determined
